# Supplementary material for: Tensile Behaviors and Mechanical Property Analyses of T-Welded Joint for Thin-Walled Parts in Consideration of Different TIG Welding Currents Using Multiple Damage Models and Fracture Criterions: Numerical Simulation and Experiment Validation
Source: MDPI journal article supplement (doi:10.3390/ma16134864), 2023-07-06
Supplement: s1 [file s1]

## Supplementary Materials—Tables in this article

**Table S1** — The relative parameters for Swift model

| Parameters      | 100A      | 140A      | 170A      | 220A      |
|-----------------|-----------|-----------|-----------|-----------|
| $\phi$          | 351.10084 | 398.22921 | 395.24122 | 380.28744 |
| $\varepsilon_s$ | 0.00396   | 0.00434   | 0.0042    | 0.00446   |
| $n$             | 0.19942   | 0.26991   | 0.26161   | 0.23757   |

**Table S2** — The relative parameters for Voce model

| Parameters | 100A      | 140A      | 170A     | 220A      |
|------------|-----------|-----------|----------|-----------|
| $\sigma_s$ | 139.5     | 100.5     | 97.5     | 112.5     |
| $\psi$     | 130.56049 | 148.07678 | 138.2901 | 126.71723 |
| $m$        | 10.66971  | 16.02394  | 20.9583  | 20.00705  |

**Table S3** — The relative parameters for H-S model

| Parameters | 100A      | 140A      | 170A      | 220A      |
|------------|-----------|-----------|-----------|-----------|
| $\sigma_s$ | 139.5     | 100.5     | 97.5      | 112.5     |
| $\xi$      | 135.46196 | 168.21967 | 162.22546 | 139.10268 |
| $k$        | 9.48236   | 8.52857   | 8.87108   | 11.86186  |
| $n$        | 0.97722   | 0.85465   | 0.80958   | 0.88281   |

**Table S4** — The relative parameters for Swift-Voce combination model ( $\lambda=0.4$ )

| Parameters      | 100A      | 140A      | 170A      | 220A      |
|-----------------|-----------|-----------|-----------|-----------|
| $\phi$          | 186.31395 | 579.09124 | 779.25954 | 607.35475 |
| $\varepsilon_s$ | 0.00396   | 0.00434   | 0.0042    | 0.00446   |
| $n$             | 0.059003  | 0.33659   | 0.40033   | 0.33257   |
| $\psi$          | 206.09922 | 96.86013  | 56.66304  | 70.45496  |
| $m$             | 9.56423   | 18.23885  | 45.01308  | 28.38472  |

**Table S5** The relative parameters for Swift-Voce combination model ( $\lambda=0.6$ )

| Parameters      | 100A      | 140A      | 170A      | 220A      |
|-----------------|-----------|-----------|-----------|-----------|
| $\phi$          | 169.17534 | 395.94388 | 537.25610 | 423.10899 |
| $\varepsilon_s$ | 0.00396   | 0.00434   | 0.0042    | 0.00446   |
| $n$             | 0.03937   | 0.26665   | 0.32950   | 0.26213   |
| $\psi$          | 310.42655 | 147.35838 | 66.41993  | 99.51346  |
| $m$             | 9.55250   | 16.00958  | 43.38825  | 24.97682  |

**Table S6 — The relative parameters for Swift-Voce combination model ( $\lambda=0.8$ )**

| Parameters      | 100A      | 140A      | 170A      | 220A      |
|-----------------|-----------|-----------|-----------|-----------|
| $\phi$          | 161.20751 | 306.65505 | 418.64691 | 334.61802 |
| $\varepsilon_s$ | 0.00396   | 0.00434   | 0.0042    | 0.00446   |
| $n$             | 0.02954   | 0.21845   | 0.28144   | 0.21633   |
| $\psi$          | 622.08267 | 309.78983 | 109.91816 | 197.30807 |
| $m$             | 9.54726   | 14.51861  | 39.34351  | 22.41282  |

**Table S7 — The parameter value for Voce-H-S combination model ( $\lambda=0.4$ )**

| Parameters | 100A      | 140A        | 170A        | 220A        |
|------------|-----------|-------------|-------------|-------------|
| $\xi$      | 278.00539 | 30.64830    | 45.98356    | 29.00182    |
| $k$        | 16.19586  | 1083922.178 | 261856.5118 | 63242.74685 |
| $n$        | 1.18829   | 2.93917     | 2.61421     | 2.37963     |
| $\psi$     | 22.34592  | 244.67361   | 225.02909   | 207.70637   |
| $m$        | 61.92545  | 12.57749    | 14.39272    | 15.50604    |

**Table S8 — The parameter value for Voce-H-S combination model ( $\lambda=0.6$ )**

| Parameters | 100A     | 140A        | 170A        | 220A        |
|------------|----------|-------------|-------------|-------------|
| $\xi$      | 185.349  | 20.80647    | 30.99811    | 19.33901    |
| $k$        | 16.19307 | 302364.5365 | 149947.7498 | 62720.11307 |
| $n$        | 1.18822  | 2.68039     | 2.501903    | 2.37793     |
| $\psi$     | 33.50718 | 366.98747   | 337.53957   | 311.55901   |
| $m$        | 61.93251 | 12.52141    | 14.32799    | 15.50511    |

**Table S9 — The parameter value for Voce-H-S combination model ( $\lambda=0.8$ )**

| Parameters | 100A      | 140A        | 170A        | 220A      |
|------------|-----------|-------------|-------------|-----------|
| $\xi$      | 139.00282 | 15.60268    | 23.24988    | 117.93708 |
| $k$        | 16.19582  | 305109.6394 | 149522.9691 | 22.45722  |
| $n$        | 1.18829   | 2.68222     | 2.50133     | 1.23831   |
| $\psi$     | 67.03743  | 733.97485   | 675.07958   | 206.20270 |
| $m$        | 61.92555  | 12.52195    | 14.32765    | 59.72887  |

**Table S10 — The parameter value for Swift-H-S combination model ( $\lambda=0.4$ )**

| Parameters | 100A      | 140A      | 170A      | 220A      |
|------------|-----------|-----------|-----------|-----------|
| $\phi$     | 347.31059 | 87.18754  | 5.19502   | 47.56016  |
| $\xi$      | 116.15585 | 326.87451 | 472.91115 | 317.24954 |
| $k$        | 23.37481  | 5.22945   | 2.49436   | 5.34757   |

|       |         |         |          |          |
|-------|---------|---------|----------|----------|
| $n_1$ | 0.17634 | 0.02973 | -0.22498 | -0.07888 |
| $n_2$ | 1.29688 | 0.71652 | 0.49319  | 0.65680  |

**Table S11** — The parameter value for Swift-H-S combination model ( $\lambda=0.6$ )

| Parameters | 100A      | 140A      | 170A      | 220A      |
|------------|-----------|-----------|-----------|-----------|
| $\phi$     | 251.47434 | 103.28559 | 9.98220   | 49.28079  |
| $\xi$      | 194.52979 | 472.97210 | 760.18055 | 506.42908 |
| $k$        | 20.76538  | 5.36841   | 2.42056   | 5.14849   |
| $n_1$      | 0.11419   | 0.03890   | -0.24473  | -0.09882  |
| $n_2$      | 1.26145   | 0.72570   | 0.47485   | 0.64144   |

**Table S12** — The parameter value for Swift-H-S combination model ( $\lambda=0.8$ )

| Parameters | 100A      | 140A      | 170A       | 220A       |
|------------|-----------|-----------|------------|------------|
| $\phi$     | 215.71425 | 121.65580 | 11.27898   | 46.34019   |
| $\xi$      | 405.95097 | 872.31351 | 1625.98090 | 1090.80824 |
| $k$        | 19.86019  | 5.70102   | 2.36030    | 4.93206    |
| $n_1$      | 0.08457   | 0.05798   | -0.26260   | -0.12085   |
| $n_2$      | 1.24774   | 0.74603   | 0.45710    | 0.62293    |

**Table S13** — The correlation coefficient value for different models

| Parameters | 100A     | 140A     | 170A     | 220A     | Mean value |
|------------|----------|----------|----------|----------|------------|
| J-C        | 0.996381 | 0.994048 | 0.991825 | 0.995960 | 0.994554   |
| H-S        | 0.997614 | 0.994244 | 0.993187 | 0.997395 | 0.995610   |
| Swift      | 0.997418 | 0.996362 | 0.994230 | 0.997548 | 0.996390   |
| Voce       | 0.997654 | 0.993138 | 0.992216 | 0.997446 | 0.995114   |
| 0.2HS-V    | 0.99759  | 0.997150 | 0.994904 | 0.997496 | 0.996785   |
| 0.4HS-V    | 0.997599 | 0.99509  | 0.994882 | 0.997509 | 0.996270   |
| 0.6HS-V    | 0.997604 | 0.995103 | 0.994895 | 0.997497 | 0.996275   |
| 0.8HS-V    | 0.997591 | 0.995098 | 0.994896 | 0.997596 | 0.996295   |
| 0.2S-HS    | 0.997588 | 0.997710 | 0.994904 | 0.997884 | 0.997022   |
| 0.4S-HS    | 0.997604 | 0.985037 | 0.994882 | 0.997894 | 0.993854   |
| 0.6S-HS    | 0.997602 | 0.995776 | 0.994895 | 0.997900 | 0.996543   |
| 0.8S-HS    | 0.997592 | 0.995727 | 0.994896 | 0.997902 | 0.996529   |
| 0.2S-V     | 0.997688 | 0.99486  | 0.994931 | 0.997874 | 0.996338   |
| 0.4S-V     | 0.997679 | 0.995102 | 0.99515  | 0.997857 | 0.996447   |
| 0.6S-V     | 0.997670 | 0.995535 | 0.995247 | 0.997609 | 0.996515   |
| 0.8S-V     | 0.997673 | 0.99543  | 0.995262 | 0.997828 | 0.996548   |

**Table S14 — The MSE value for different models**

| Parameters | 100A     | 140A     | 170A     | 220A     | Mean value |
|------------|----------|----------|----------|----------|------------|
| J-C        | 0.361828 | 0.216333 | 0.233216 | 0.052057 | 0.215858   |
| H-S        | 0.267657 | 0.190173 | 0.209303 | 0.034078 | 0.175303   |
| Swift      | 0.361738 | 0.216070 | 0.233335 | 0.052206 | 0.215837   |
| Voce       | 0.361816 | 0.215769 | 0.233702 | 0.052493 | 0.215945   |
| 0.2HS-V    | 0.266765 | 0.042449 | 0.194651 | 0.037814 | 0.135420   |
| 0.4HS-V    | 0.266776 | 0.178807 | 0.195107 | 0.037529 | 0.169555   |
| 0.6HS-V    | 0.266777 | 0.178793 | 0.195101 | 0.037527 | 0.169550   |
| 0.8HS-V    | 0.266331 | 0.178653 | 0.194321 | 0.049037 | 0.172085   |
| 0.2S-HS    | 0.255664 | 0.183009 | 0.194651 | 0.049467 | 0.170698   |
| 0.4S-HS    | 0.257025 | 0.182941 | 0.195107 | 0.049867 | 0.171235   |
| 0.6S-HS    | 0.256796 | 0.183402 | 0.194787 | 0.050306 | 0.171323   |
| 0.8S-HS    | 0.256990 | 0.183024 | 0.194321 | 0.028845 | 0.165795   |
| 0.2S-V     | 0.331267 | 0.203005 | 0.210079 | 0.039760 | 0.196028   |
| 0.4S-V     | 0.330868 | 0.200639 | 0.208857 | 0.041675 | 0.195510   |
| 0.6S-V     | 0.330742 | 0.197457 | 0.209317 | 0.043804 | 0.195330   |
| 0.8S-V     | 0.330774 | 0.195636 | 0.210113 | 0.044213 | 0.195184   |
